# Supplementary figures and images for: Lateral interactions between protofilaments of the bacterial tubulin homolog FtsZ are essential for cell division
Source: eLife journal article supplement (doi:10.7554/elife.35578), 2018-06-11

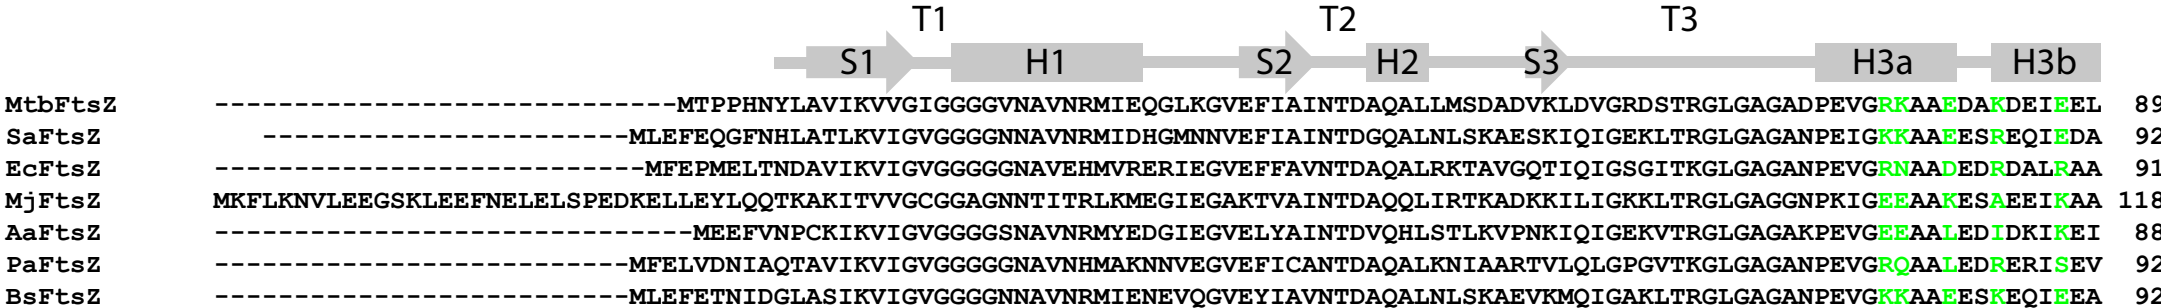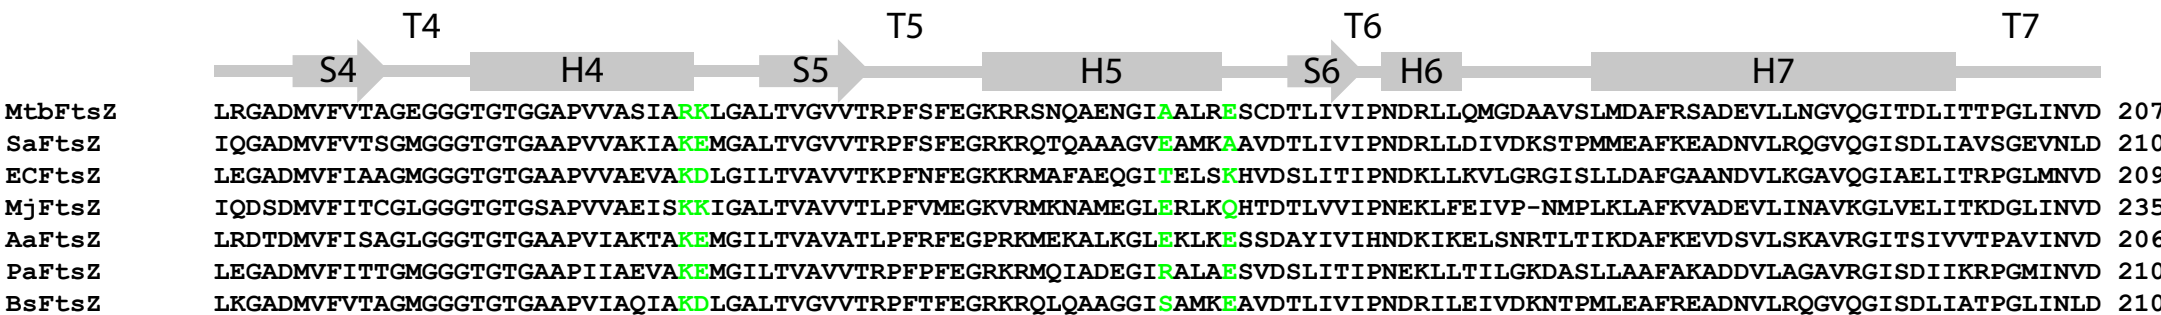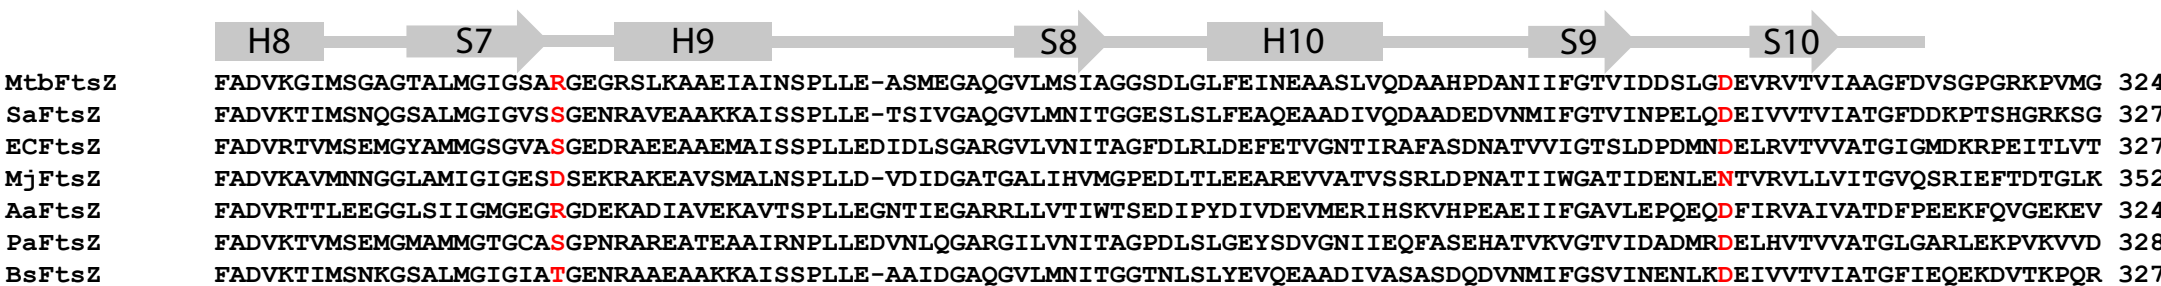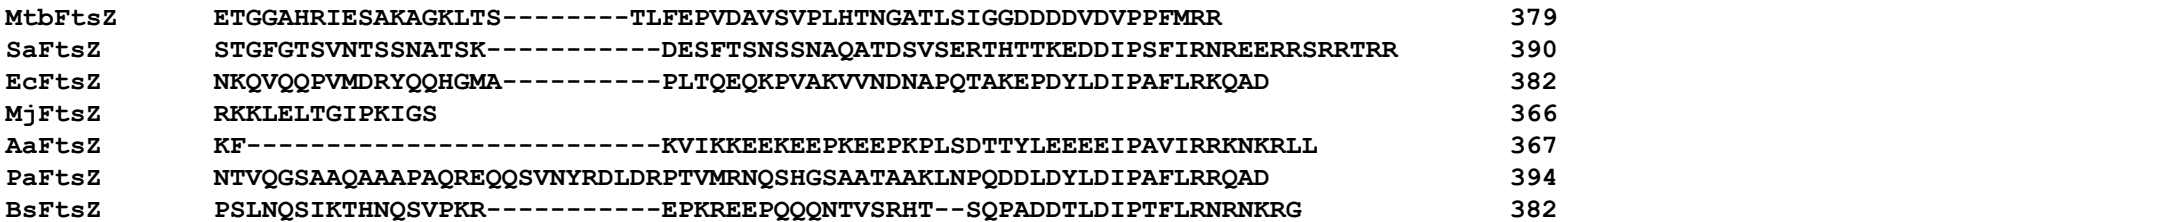

Supplement: supp [file elife_poa_e35578_Figure_1_figure_supplement_1.pdf › elife_poa_e35578_Figure_1_figure_supplement_1.pdf]

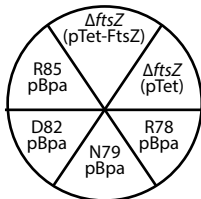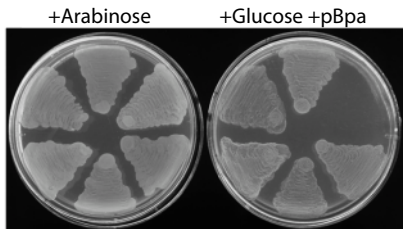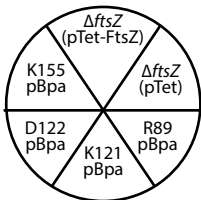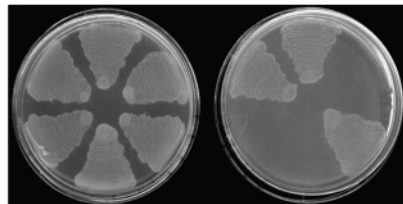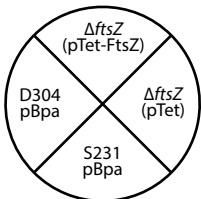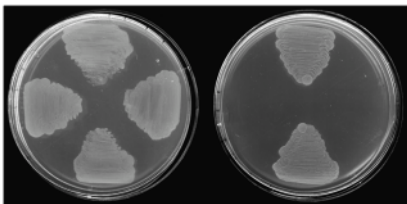

Supplement: supp [file elife_poa_e35578_Figure_4_figure_supplement_1.pdf › elife_poa_e35578_Figure_4_figure_supplement_1.pdf]

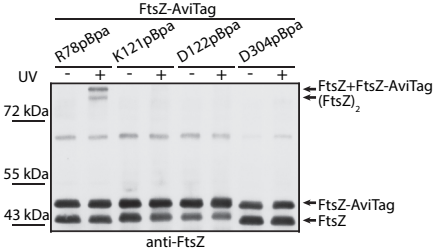

Supplement: supp [file elife_poa_e35578_Figure_4_figure_supplement_2.pdf › elife_poa_e35578_Figure_4_figure_supplement_2.pdf]

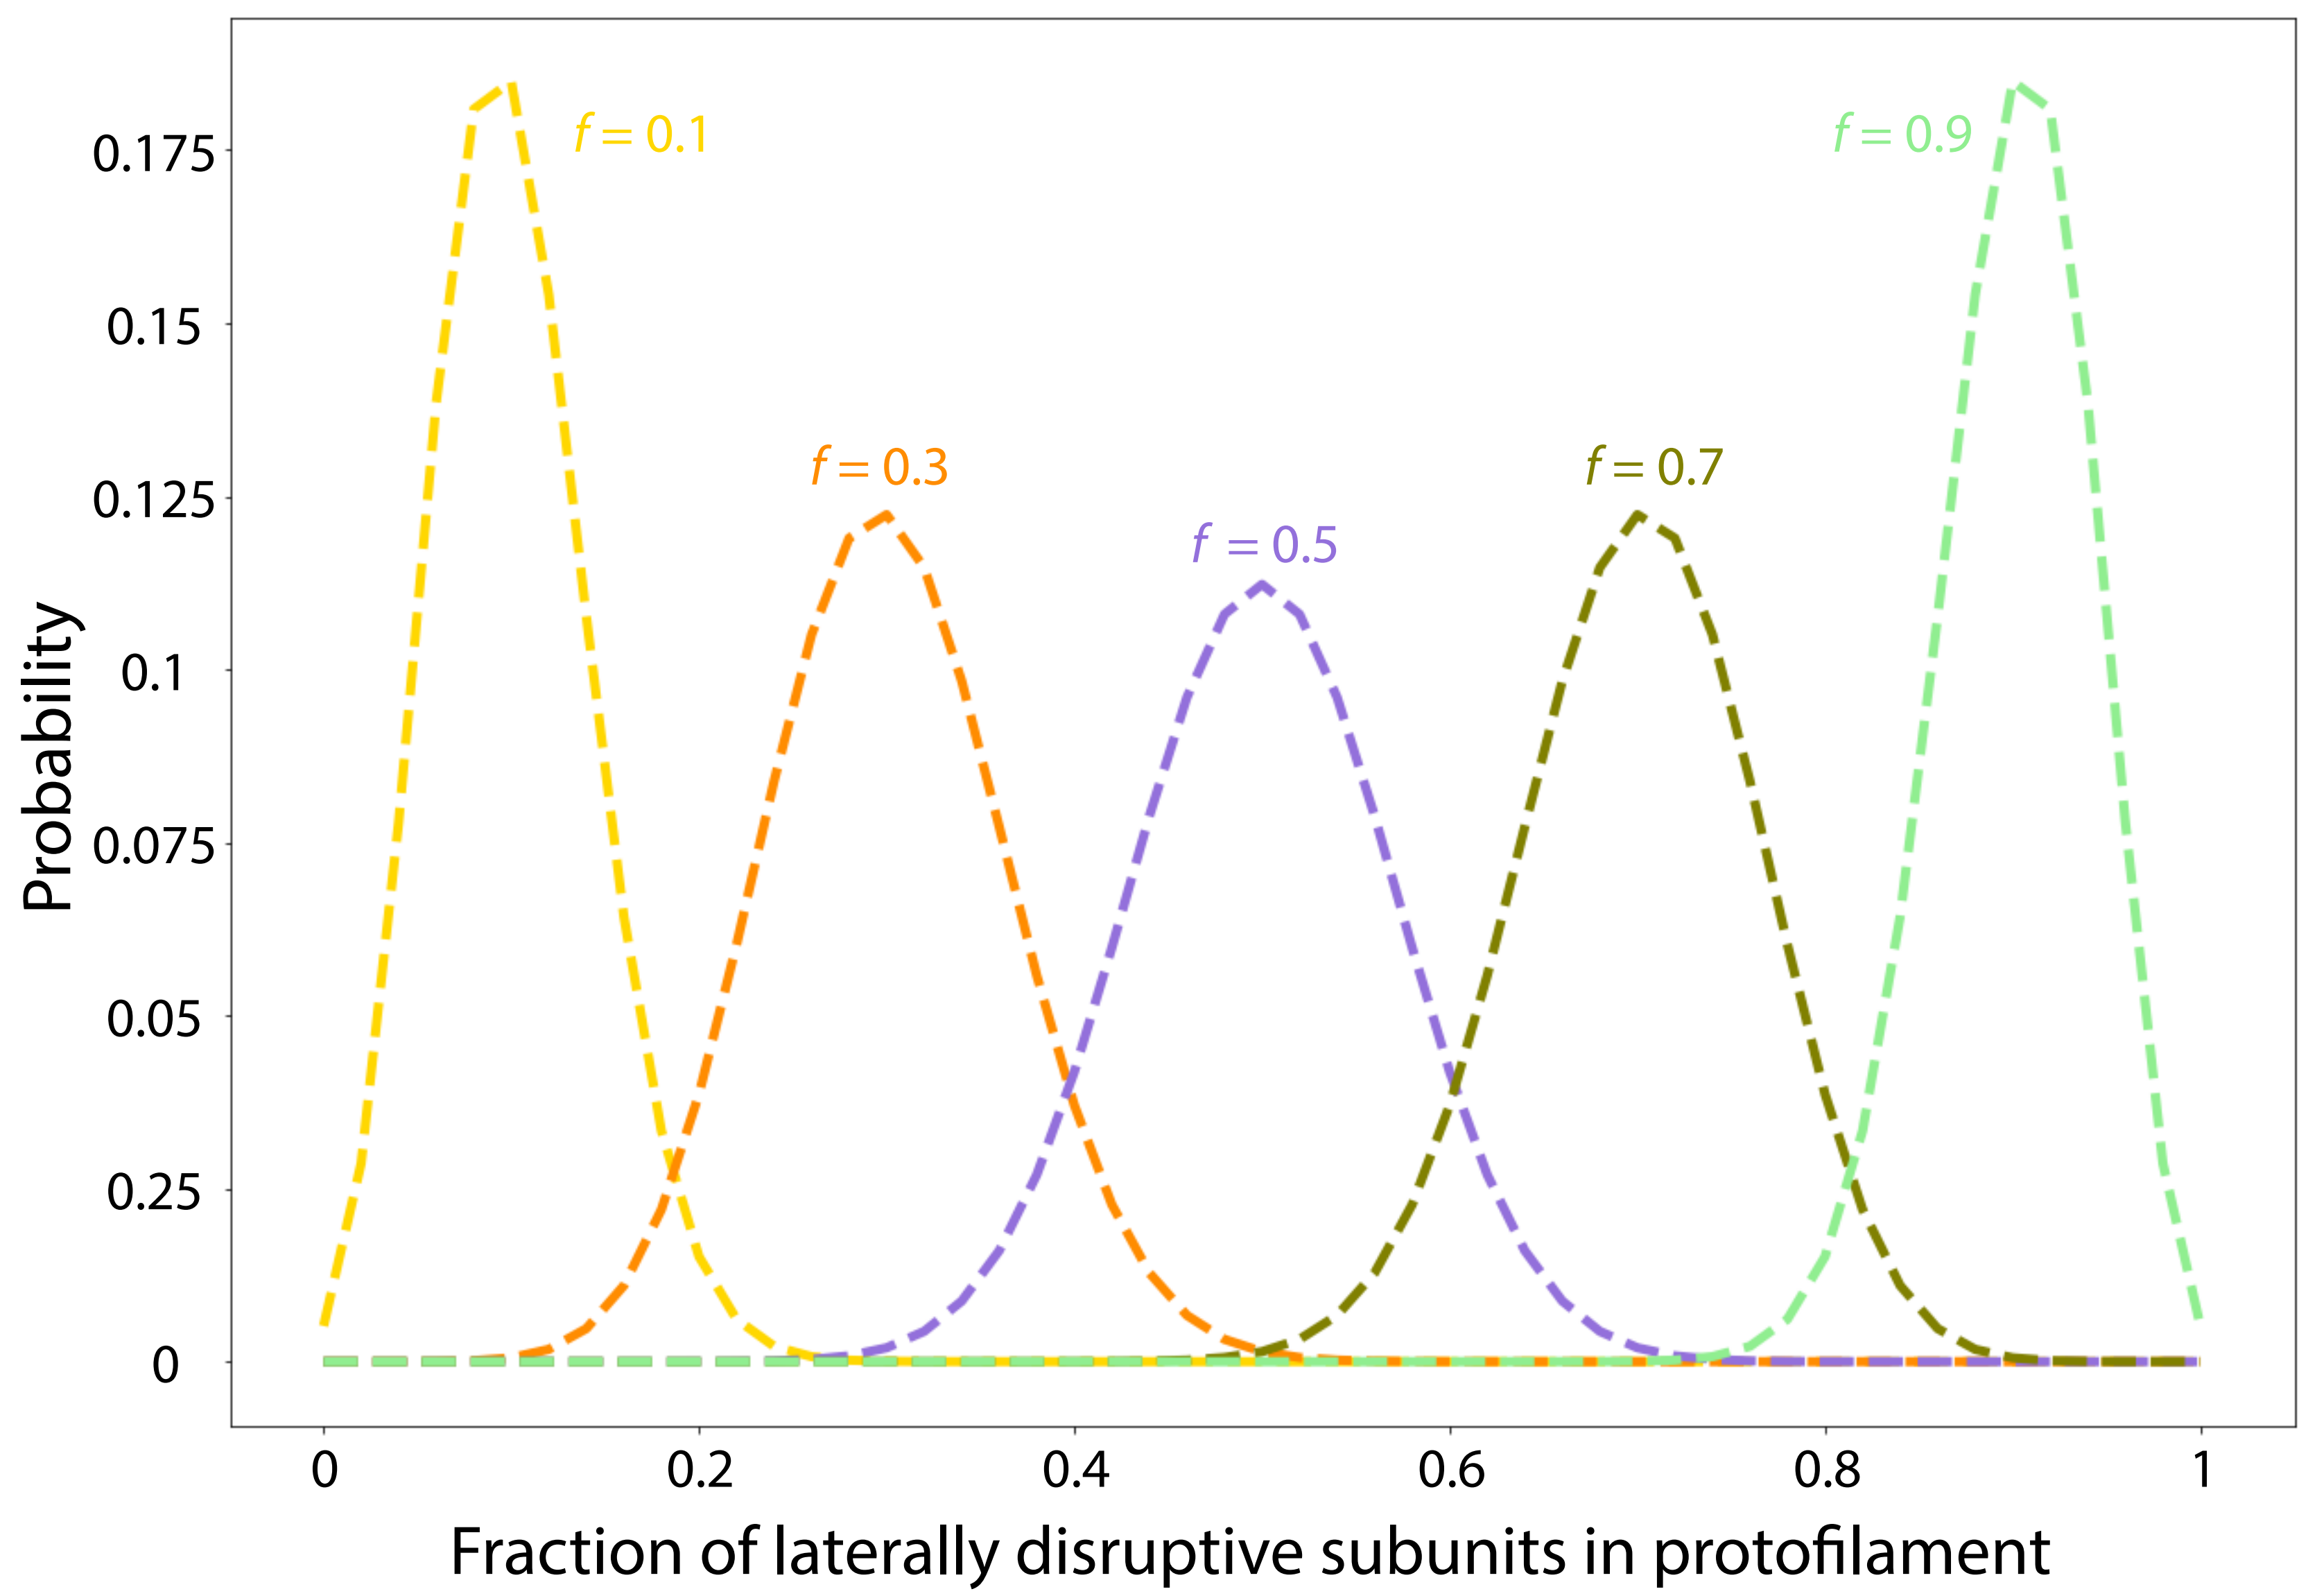

Supplement: supp [file elife_poa_e35578_Figure_7_figure_supplement_1.pdf › elife_poa_e35578_Figure_7_figure_supplement_1.pdf]

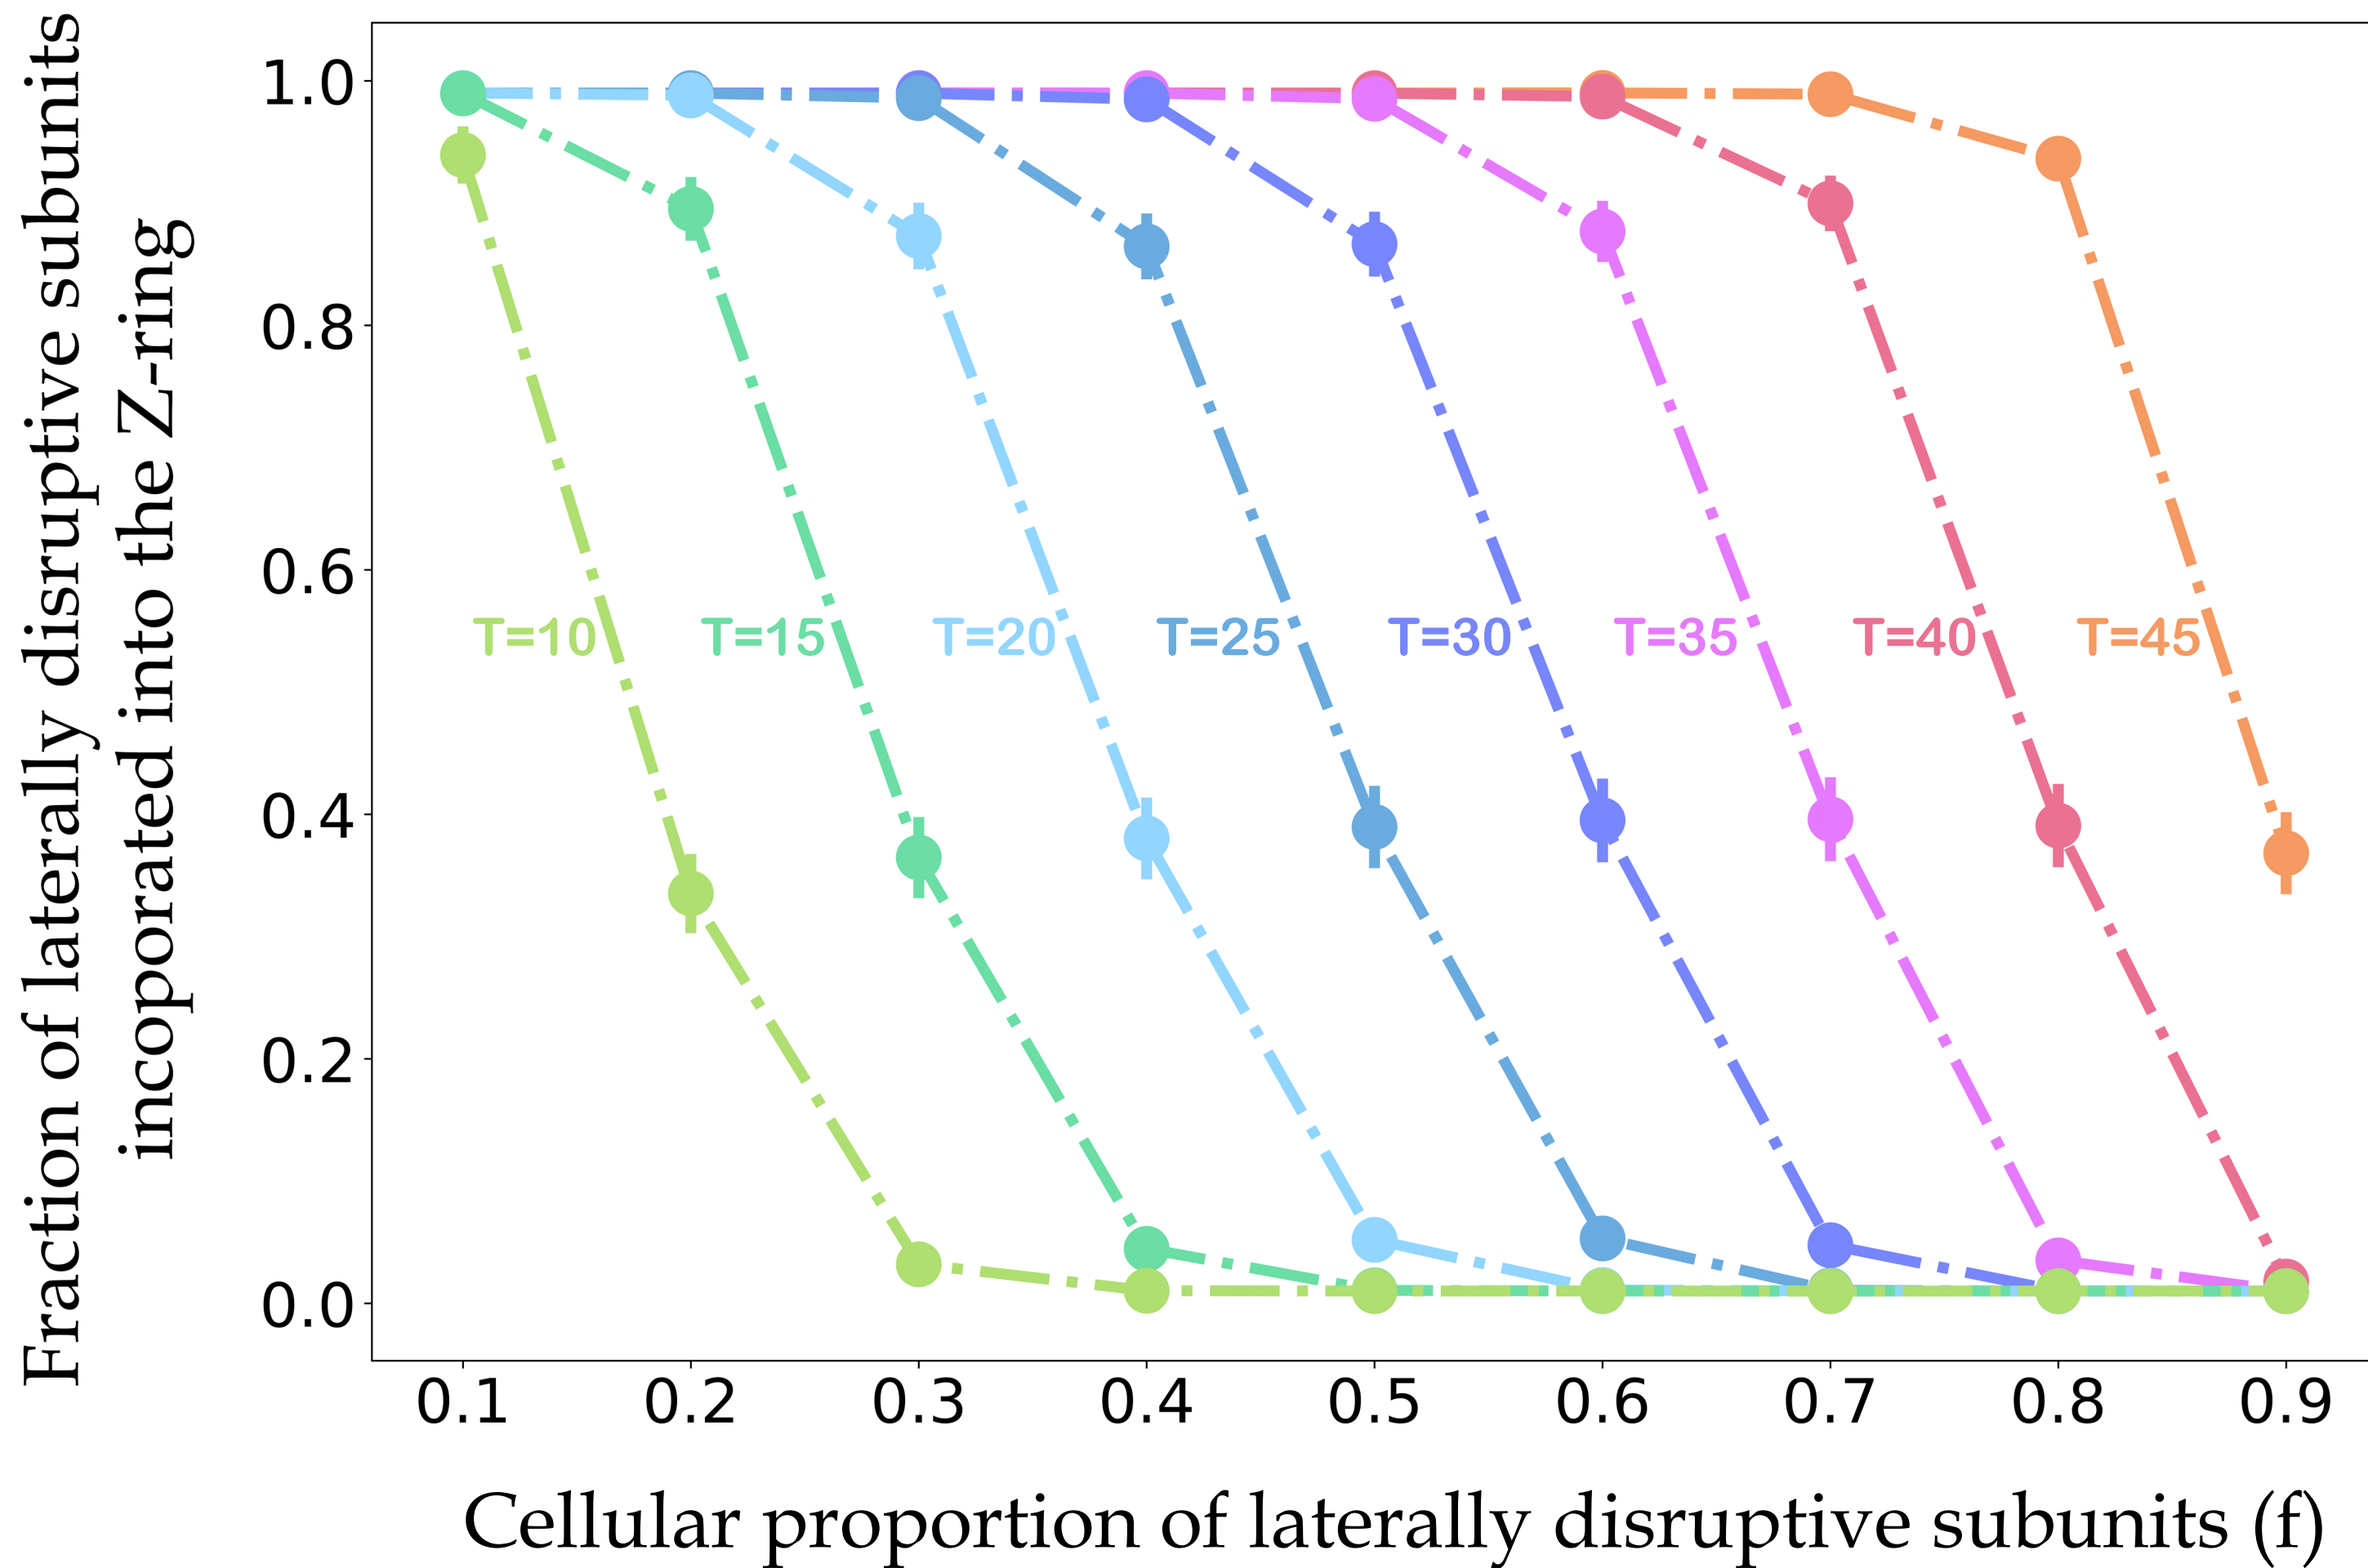

Supplement: supp [file elife_poa_e35578_Figure_7_figure_supplement_2.pdf › elife_poa_e35578_Figure_7_figure_supplement_2.pdf]
